# Supplementary material for: Laboratory and field evaluation of the Aerosol Dynamics Inc. concentrator (ADIc) for aerosol mass spectrometry
Source: Copernicus journal article supplement (doi:10.5194/amt-12-3907-2019), 2019-07-16
Supplement: Supplementary file 1 [file amt-12-3907-2019-supplement.pdf]

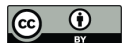

*Supplement of*

## **Laboratory and field evaluation of the Aerosol Dynamics Inc. concentrator (ADIC) for aerosol mass spectrometry**

**Sanna Saarikoski et al.**

*Correspondence to:* Sanna Saarikoski ([sanna.saarikoski@fmi.fi](mailto:sanna.saarikoski@fmi.fi))

The copyright of individual parts of the supplement might differ from the CC BY 4.0 License.

## Supplemental Information

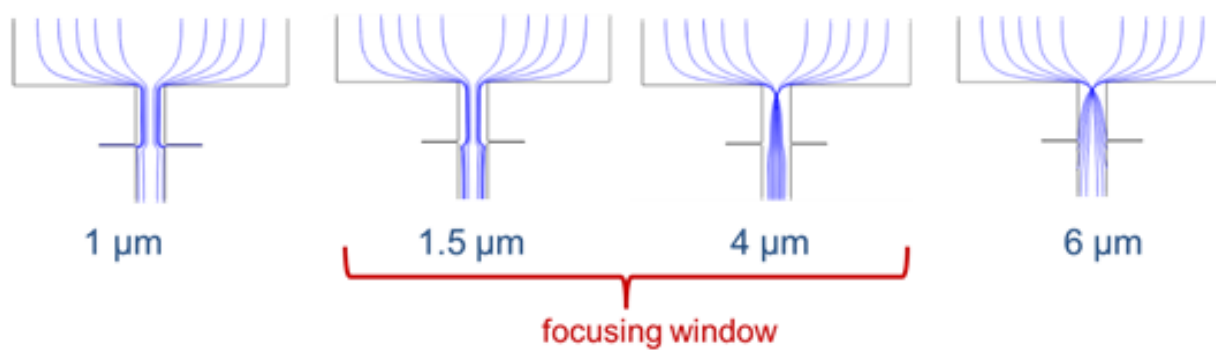

**Figure S1.** Calculated particle trajectories for different particle sizes entering the focusing nozzle of the ADIc. Scale is expanded radially for better visualization.

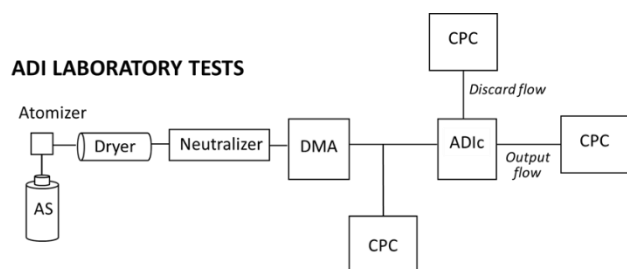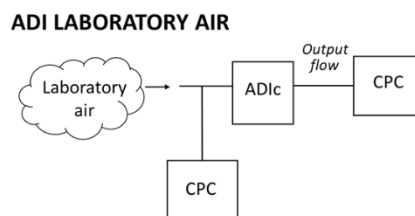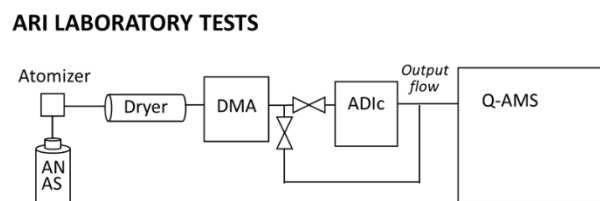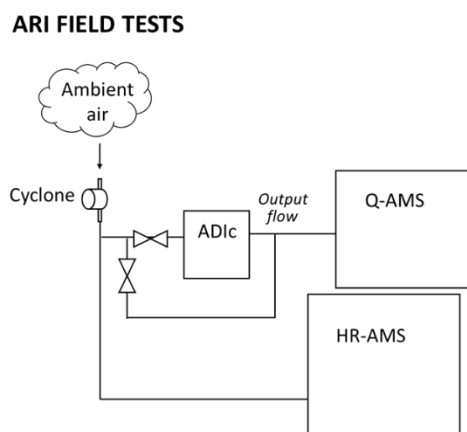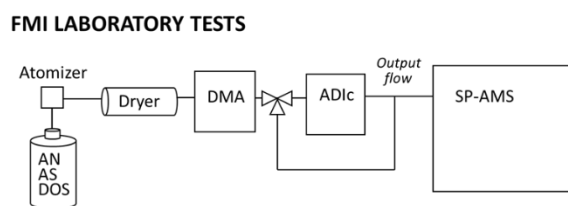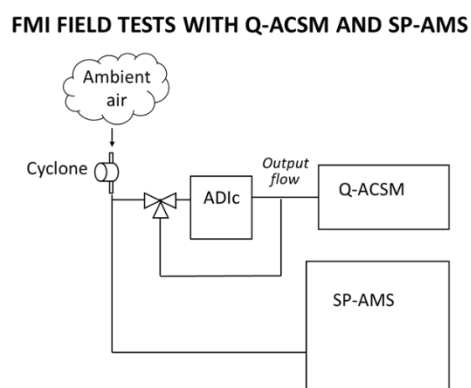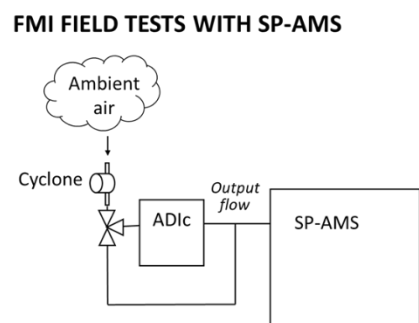

**Figure S2.** Diagrams for the instrumental set-ups used in the laboratory and field tests at Aerosol Dynamics Inc. (ADI), Aerodyne Research, Inc. (ARI) and Finnish Meteorological Institute (FMI).

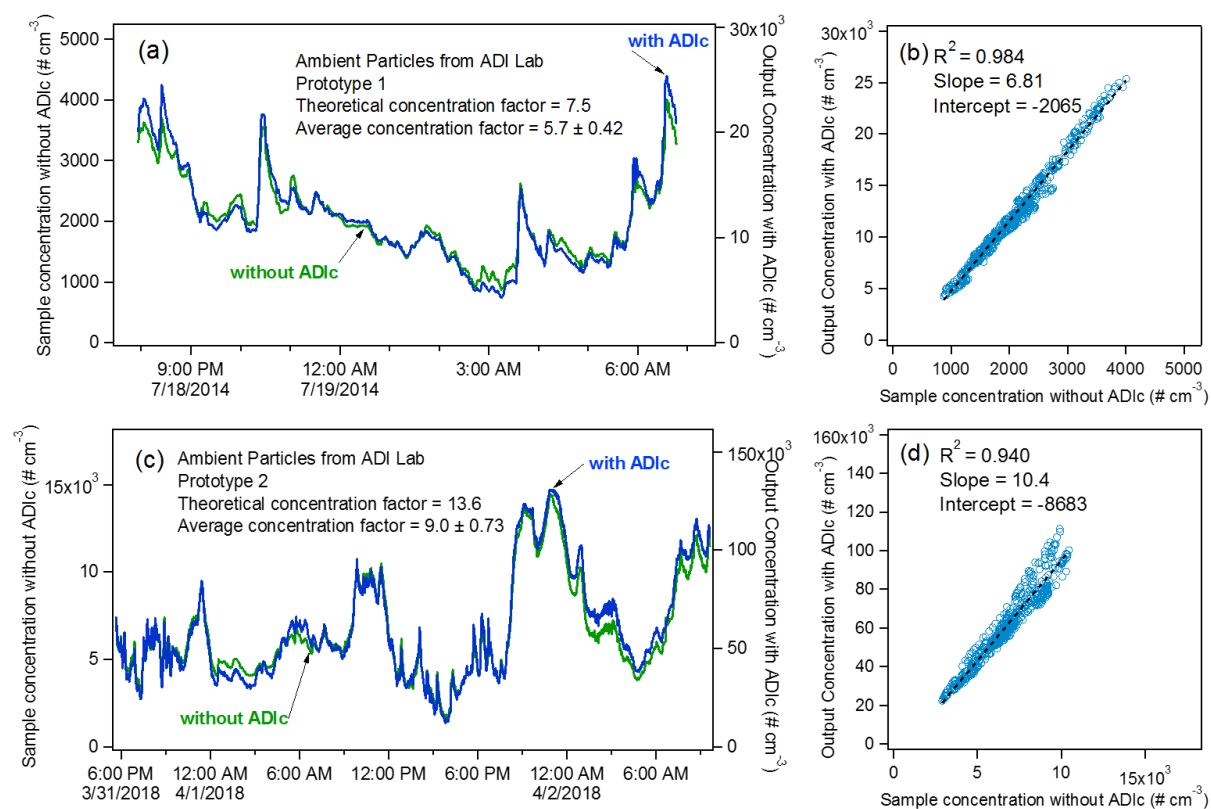

**Figure S3.** Particle number concentrations in the ADIc sample and output flows while sampling laboratory air shown as time series (a, c) and as correlation plots (b, d). Prototype 1 was operating at low flow (a–b) and prototype 2 at high flow (c–d).

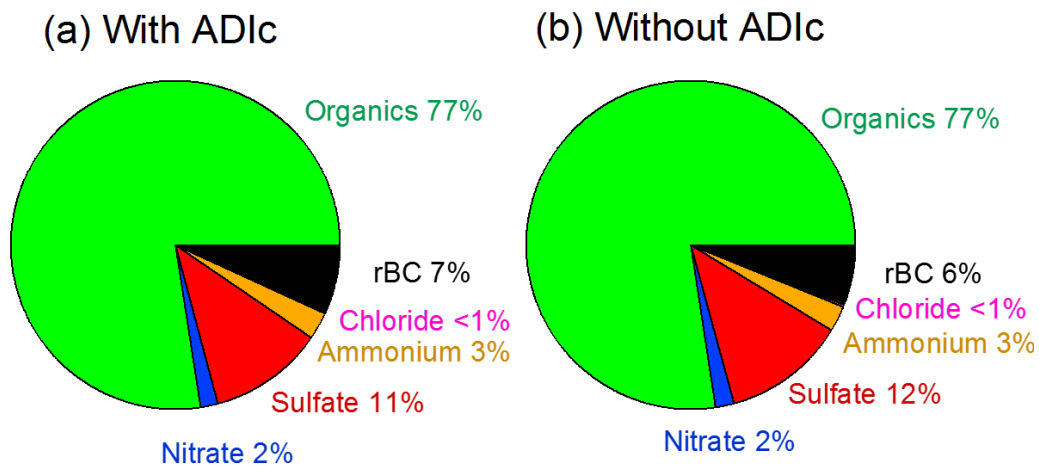

**Figure S4.** Chemical composition of particles with the ADIc (a) and without the ADIc (b) measured with the SP-AMS at SMEAR III. Sampling time was 70 minutes with the ADIc and 70 minutes without the ADIc. The theoretical concentration factor was 21.3.

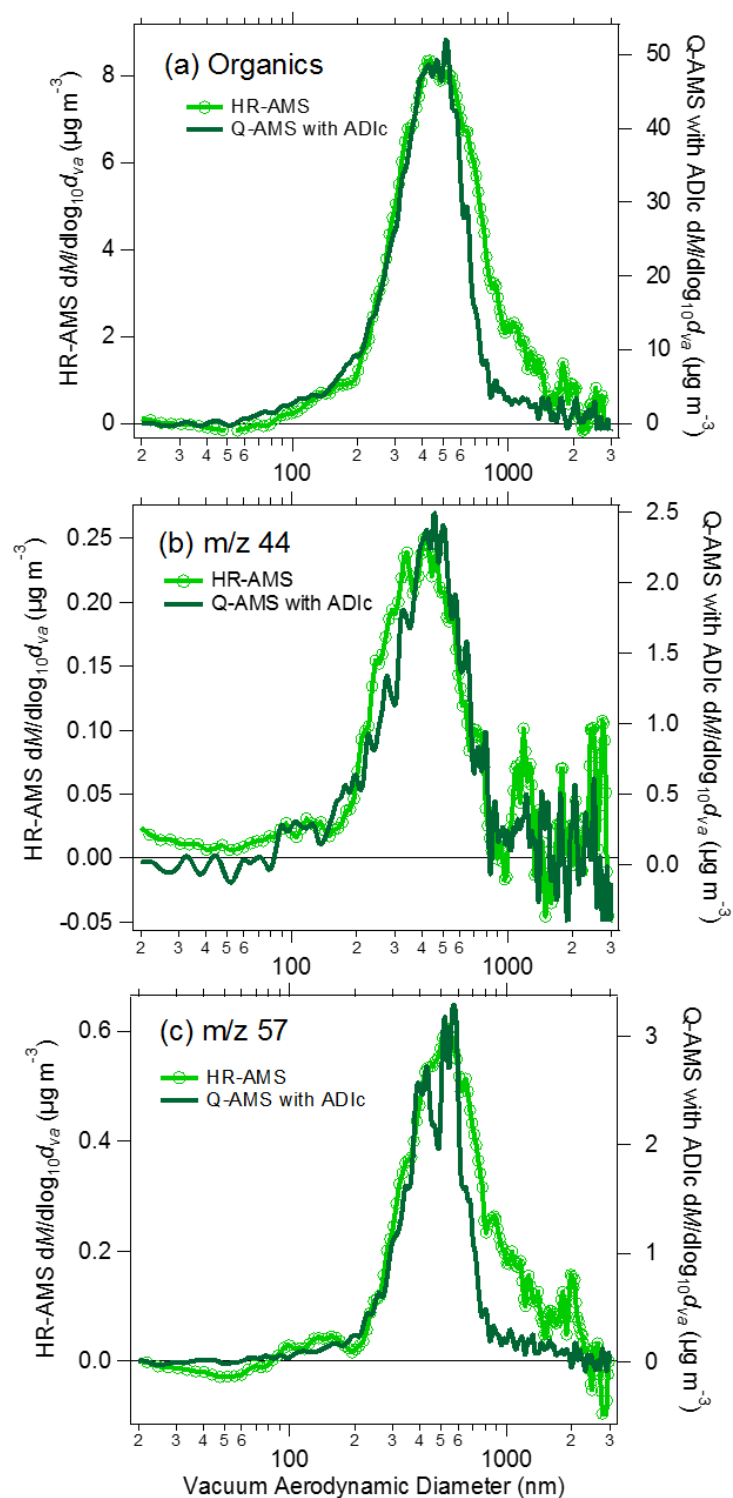

**Figure S5.** Size distributions for organics (a), m/z 44 (b) and m/z 57 (c) from the HR-AMS in bypass (without the ADIc) and the Q-AMS behind the ADIc demonstrating different size cutoffs in the aerodynamic lenses >700 nm in the two instruments.
